# Supplementary material
Source: PubMed Central journal article supplement (PMC3715131)
Supplement: NIHMS301717-supplement-Supplementary_Fig_1.pdf [file NIHMS301717-supplement-Supplementary_Fig_1.pdf]

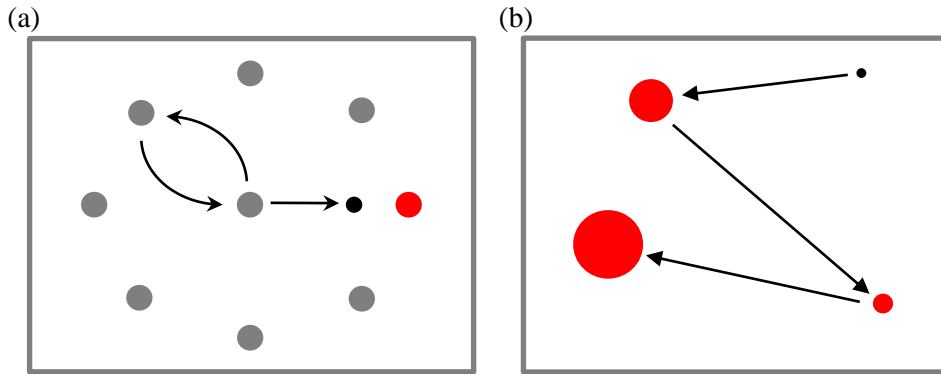

**Supplemental figure 1.** Two tasks for assessing neural cursor point-and-click control. (a) The Radial-8 task assessed control over a large portion of the computer desktop. Nine targets (8 peripheral and 1 center) were always visible but only one was highlighted for selection on each trial. Selecting any other target ended the trial with an error. The neural cursor (black), targets, and screen size (rectangular border) are drawn to scale. (b) In the mFitts1 task, three different sized targets (red) were presented. Although three targets are shown here (to scale) to give a sense of the three target sizes relative to the neural cursor (black) and display screen (encompassing rectangle), only one target was presented at a time during this sequential task. When the user clicked on top of the current target the next would appear with one of the 3 diameters in a (pseudo) random location. Figure is drawn to scale. Arrow notations did not appear on either display.
